# Supplementary material for: Phenotypic transitions enacted by simulated microgravity do not alter coherence in gene transcription profile
Source: PubMed Central journal article supplement (PMC6872750; doi:10.1038/s41526-019-0088-x), 2019-11-21
Supplement: 41526_2019_88_MOESM2_ESM.pdf [file 41526_2019_88_MOESM2_ESM.pdf]

## Supporting information

### Supplementary Methods

*The experimental model.* We used a coarse-grain statistical metrics for estimating the behavior of a gene ensemble, adopting a statistical mechanics-inspired model of biological regulation (1). Accordingly, whole genome expression is ruled by self-organization processes, as described by the Self Organized Criticality (SOC) theory (2).

Briefly, SOC considers a cell-fate decision-making model where diverse cell-fate options are first generated by sorting out of various transcriptional programs, and then a cell-fate gene module is selectively amplified when the network system approaches a critical state.

It is generally assumed that each differentiated state – a cell phenotype - corresponds to a very stable gene expression pattern. This condition implies that the system displays *high coherence values*, recognizable by *very strong correlation between key parameters* (transcriptome profiles, among others) obtained from independent samples belonging to the same tissue (3). Supplementary Methods figure 1 refers to MCF7 cell line and clarifies this point: the axes refer to two independent MCF7 samples whose single gene expression values are the points of the graph (around 23000, expression values in logarithm units), the d-value corresponds to the range (box size) of variation, inside which the correlation

(Pearson coefficient,  $r$ ) is computed (3). The correlation computed overall is near to unity ( $r = 0.98$ ), and declines at decreasing range of variation. The inset on top left angle of the figure shows the reaching of a plateau correlation at  $d = 0.45$ . This remark outlines how correlation values are tightly dependent on the observation scale, and it is consequently mandatory to choose a proper level of observation in setting the experimental investigation. The scale dependence of the correlation is instrumental to keep alive both the functionality of the tissue (the specialized physiological function asks for an invariant “ideal” pattern of gene expression) and the flexibility required to adapt to changing microenvironment, tuning the specific gene expressions at the small scale. This fine-tuning does not alter the global profile invariance and corresponds to the scattering of the points around the identity line reported in Supplementary Methods figure 1. Even if (slightly) less precise, this correlation holds even at the single cell scale (4), and changes in single cell correlation structure are instrumental to predict cell fate transitions (5). The dispersion across the identity line corresponds to the equilibrium around a definite physiological state and keeps invariant the correlation coefficient between two snapshots of the cell population. Only when the system undergoes a transition toward another state, with a concomitant wide modification in gene expression pattern, this correlation changes in a relevant manner. In principle, any directed modification of the phenotypic state is sustained by the coordinated change of activities at a large number of gene loci across the genome, altering the relative proportion of gene expression, thus affecting their mutual correlation. Because

genes influence one another's expression by means of a network of regulatory interactions, genes cannot alter their expression in an *independent* manner, and transcriptomes (which are the measurable *proxies* for genome-wide gene activation profiles and hence, for cell states) can change only in a *highly constrained manner* (6).

### Supplementary Methods figure 1

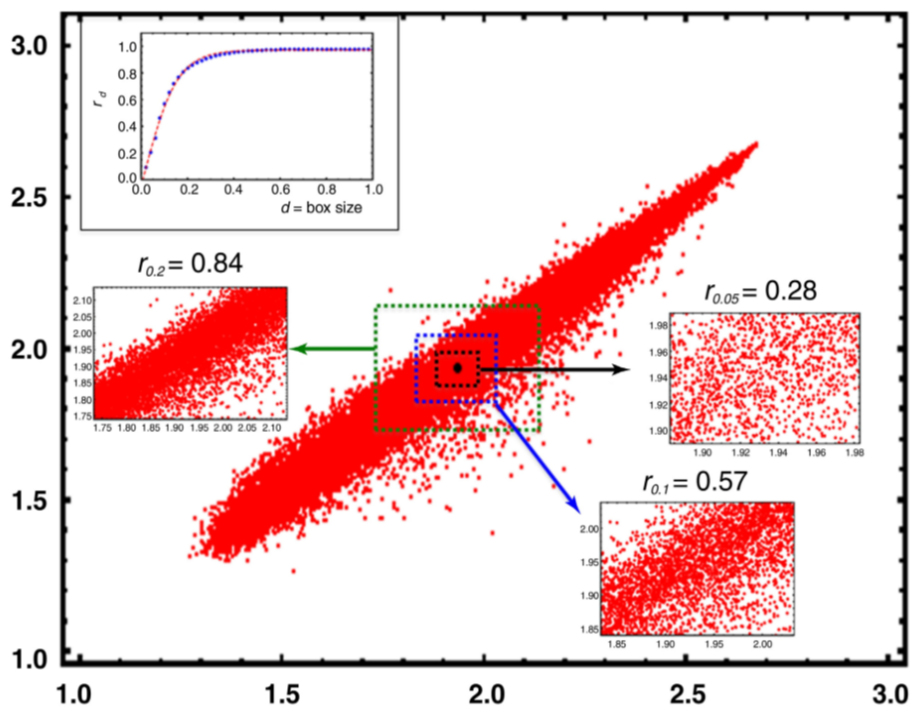

**Supplementary Methods Fig. 1. Pearson's correlation between independent samples of the same cell type.** The figure reports the correlation between two independent samples of MCF7 (axes of the plot) in terms of expression levels of around 23000 genes (vector points). The overall correlation is near to unity ( $r = 0.98$ ) consistently with the existence of a main attractor correspondent to the cell-kind. At smaller scale of variation (different values of  $d$ , box-size) the correlation decreases,

given the local expression fluctuations needed to cope with slight environmental changes (genetic noise) obscure the existence of an 'ideal expression profile'. The top-left inset shows how the attractor structure is fully present at  $d = 0.45$  (modified from (11)).

It is crucially important to keep in mind the hierarchical character of the definition of 'state': each cell type can be defined, in dynamical terms, as an 'attractor', i.e. a minimum energy configuration to which the system returns when the effect of a perturbation (e.g., a drug, a physical cue) fades away. We can imagine this attractor as a deep valley of a rugged energy landscape (6). The minimum-energy bottom of this valley, in analogy with protein three-dimensional configuration, is not a single point but admits several sub-attractors that can be considered quasi-stable states in which the system might reside (7). The presence of multiple, quasi-identical solutions of energy minima at the bottom of the energy landscape is instrumental to guarantee adaptation to environmental changes. In principle, a physical constraint can modify the phenotypic state, without modifying the cell type. This would correspond to a (relatively small) change in between gene expression profiles correlation coefficient (hypothesis b).

We set us in investigating such changes in correlation values between gene expression profiles to check for a 'gene expression profile counterpart' of the morphological changes induced by microgravity. In order to have a magnitude estimation of such changes, we are describing herein previously published correlation values between transcriptomes of the same tissue in two physiological

states (Supplementary Methods figure 2a), together with the correlation between two different tissues relative to the same animal (Supplementary Methods figure 2b). Passing from the same tissue in different physiological states (jumping between two sub-attractors of the same main tissue attractor) to two different tissues (two different main attractors), the correlation coefficient drops from 0.97 to 0.30. The near to unity correlation of different physiological states relative to the same tissue (Supplementary Methods figure 2a), depends from the existence of a tissue-specific 'ideal' profile shared by the different states, which disappears in the bottom panel representation (Supplementary Methods figure 2b) (8).

## Supplementary Methods figure 2

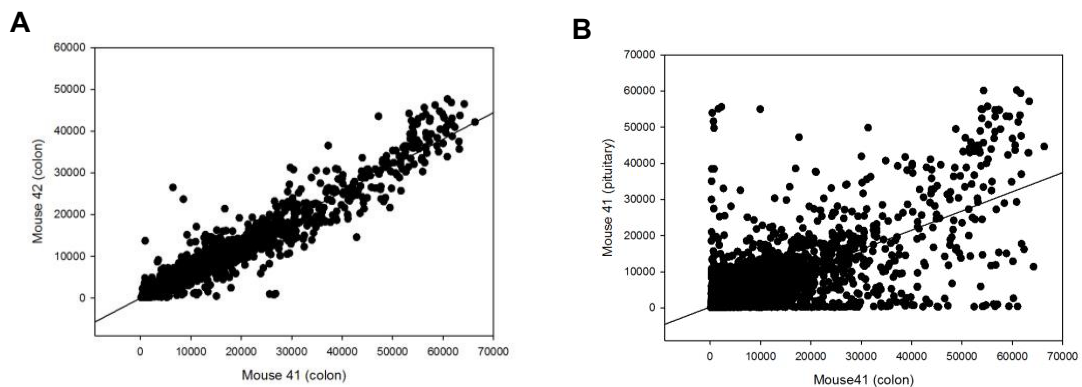

**Supplementary Methods Figure 2. Gene expression patterns and Pearson's correlation coefficients.** Fig. 2a reports the gene expression profiles of two independent (obtained from different animals) samples of the same tissue (colon). Fig.2b depicts on x-axis the gene expression profiles relative to two different tissues (colon and pituitary gland) pertinent to the same animal. In the top-

panel, correlation is near to unity ( $r=0.97$ ), whereas it drops to  $r=0.30$ , when different tissue of the same animal are considered (bottom panel) (modified from (8)).

In physical-mathematical terms, we consider every stable transcriptome as an 'attractor', to which the system tends to come back when perturbed. In biological terms, we can define an 'attractor' as a stable, observable cell phenotype in which all gene regulatory interactions show slight oscillations, preserving the overall coherence. Accordingly, the switch from one stable cell state to another corresponds to a 'transition' from one attractor to another (9). The invariance of gene expression profile in respect to perturbations (resilience) comes from the existence of robust gene interaction network. This implies that a tissue observed at different time intervals keeps a near to unity autocorrelation in respect to its initial ( $t_0$ ) profile, displaying only minor variations, mostly due to stochastic fluctuations. We must outline that the autocorrelation is detectable given we select a *sufficiently wide range of mean expressions* of any choice of probe genes, instead of analysing the overall transcriptome landscape, as already reported in greater details (2, 10, 11). Therefore, here we focused on an appropriate set of 26 gene expression data. These 26 genes – independently from the biological function they fulfil - were chosen with a sufficiently diverse average expression range of variation ( $d = 0.60$  in logarithmic units, well inside the plateau correlation range, see inset of Supplementary Methods figure 1) to highlight the attractor-like behaviour. In the full-rank situation each sample is thus a 26-component, real-valued vector. It is

worth noting to recall that cell cultures *in vitro* do not perfectly adhere to the ideal portrait. They are more aptly defined as 'quasi' equilibrium states, as we do expect a slow decay of autocorrelation in time reflecting the impossibility to maintain forever viable an *in vitro* cell culture (11). On the other hand, a lethal disruption of the gene interaction networks is expected to destroy the between profiles correlation. We selected genes relative to a coherent network that, as expected, gave rise to very high average between genes correlation ( $r = 0.834$ ,  $SD = 0.07$ ). This between genes strict correlation is instrumental for dealing with eventual missing values. Each pairwise comparison between profiles can be only computed over the components (gene expression data) esteemed in both samples. The mutual correlation between gene expression values, reassures us that the obtained results are largely invariant for small variations of the considered genes due to eventual missing values. According to the aforementioned approach, we planned to investigate the following points:

1. Assessment of quasi-stability of cells exposed to microgravity is crucial to eliminate the possibility that microgravity exerts a disruptive effect on cells. The quasi-stability condition would be mirrored by the observation of near-to-unity autocorrelation values across different times for gene expression profiles in the three experimental conditions: OG (cells On Ground), RPMAD (Adherent Cells obtained in simulated microgravity by Random Positioning Machine) and RPMCLUM (Random Machine Positioning Clump cells). We expect that time spent in microgravity only provokes a mild decay from unity correlation with  $t_0$ , and in any

case, a decline of the same order of magnitude of what happens in OG condition, only due to the forcedly artificial character of *in vitro* cell cultures.

2. We thus posit that the dramatic changes on both morphology and functions (apoptosis, proliferation) observed in cell exposed to microgravity are adaptive modifications, involving only modest changes in the overall gene expression patterns. In this case, quantitative gene changes must be 'buffered' and coordinated across the different genes, so provoking a shift of the system to another sub-attractor state (a new stable situation). This discrete minor (i.e. relative to the minor ruggedness on the bottom of minimum energy valley) 'transition' allows the system in preserving its 'identity' (exactly in the same way the haemoglobin molecule preserves its identity going from R to T configuration).

3. According to this framework, the recovery rate of the native OG gene profile from different physiological states elicited by the microgravity condition is expected to be inversely proportional to the distance of these states from the native OG state. The comeback trajectory should then display a hysteresis-like behavior. Hysteresis means that a system has more than one stable state in respect to changes occurring in a (internal/external) control parameter, where the 'manipulation' of that parameter can eventually enable the reversion to the native state. In this case, the forward and return trajectories are not coincident, due to both the 'memory' (12) of the previous visited states and the non-ideal character of the transformation. Broadly speaking, this means that to induce a switch back to the original stable state (the native 'attractor'), the system needs to go back through another bifurcation point. Such



hysteresis cycles have been largely investigated in ecology (13) but are actually observed also in cell state changes dynamics (14).

We checked point 1) by calculating the autocorrelation in time of the three OG, RPMAD and RPMCLUM conditions. We investigated point 2) by computing the correlation between Euclidean and Angular distances from reference OG state. Euclidean distances embed both additive (expression differences over the entire set of genes) and profile (relative proportions) changes. The Euclidean distance measures how the expression gene profiles differ in magnitude among the different samples, e.g. to what extent the same genes are differently expressed (Supplementary figure 2). On the contrary, cosine (angular) distances correspond to the angle between two vectors. Pearson correlation coefficient permits to measure such distance as it corresponds to the cosine of the angle between the two analysed variable vectors (in our case the gene expression profiles). The angle distance distinguishes how gene expression pattern differs in terms of relation among different gene expression, thus recognizing a *qualitative* difference in their expression pattern. In practice, if we have three genes with expression values 10, 20, 30 in sample A and 20, 40, 60 in sample B, they have non-zero Euclidean distance ( $d(AB) = 37.4$ ). On the contrary, they have a zero angular distance (the two A and B vectors have a Pearson correlation  $r = 1$ , given the proportions among their components do not differ), being Pearson  $r$  the cosine of the angle between the two vectors that is to say the two vectors are parallel (zero angle) (15).

The demonstration of a statistically significant and relevant co-variation between Euclidean and Angular measures would demonstrate that the quantitative changes happen in a coordinated manner over the entire set of genes pointing to the need of adjusting mutual gene expression proportions according to the existence of sub-attractors correspondent to different populations. Finally, point 3) was investigated by the projection of different samples on a polar plot where y-axis is the Euclidean distance values and x-axis reports Angle values, determined in respect to the reference OG profile located at the centre of the plot. This representation highlights the hysteresis character of the phenotypic states trajectory with respect to the OG baseline condition, while allowing us to estimate the mutual distances in the gene expression multidimensional phase space among different samples (16).

## Supplementary figure 1

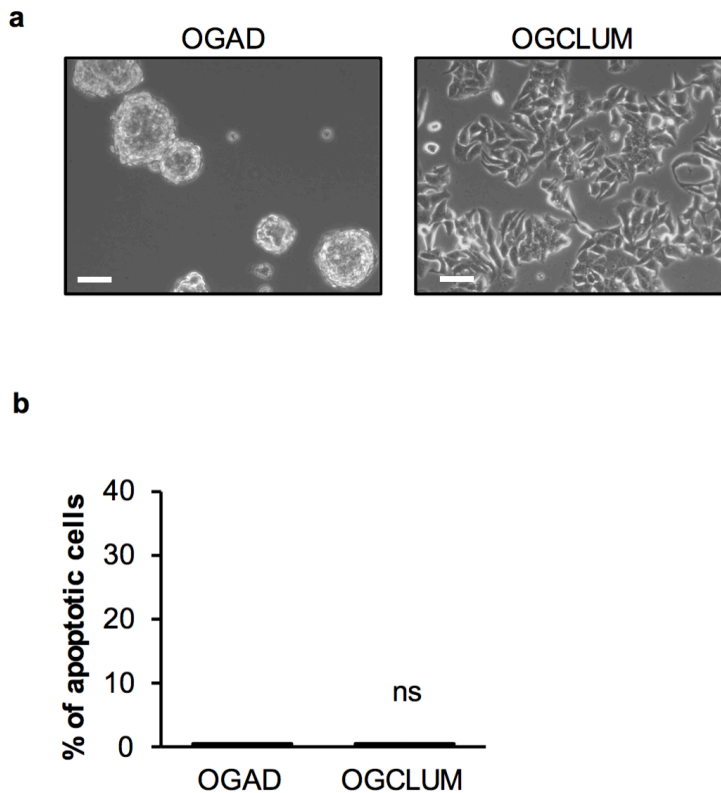

**Supplementary figure 1. (a)** MCF7 were grown for 72 hours in ultra-low attachment vessels (Corning) to prevent the attachment and the monolayer growth observed in standard OG conditions (OGAD : on ground, adherent ; OGCLUM : on ground, clumps). **(b)** apoptosis was assessed in MCF7 grown in monolayer (OGAD) and in MCF7 grown in non-adherent conditions (OGCLUM). Scale bar : 50  $\mu$ m. Ns : not significant.

## Supplementary figure 2

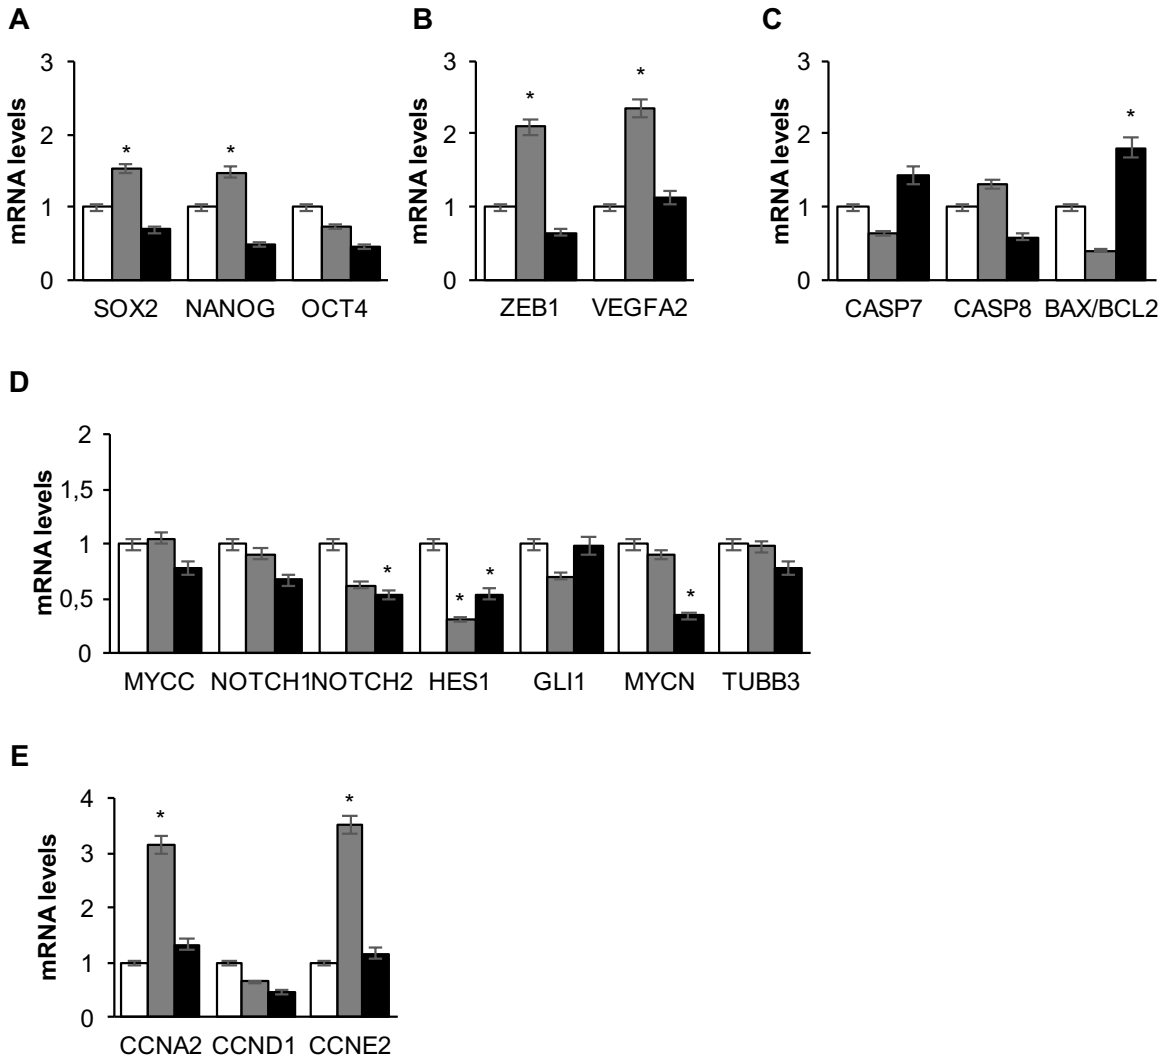

**Supplementary figure 2.** Histograms show the modulation of analyzed genes in normal gravity (OG) and after microgravity, dividing the two population of adherent cells (RPMAD) and clumps (RPMCLUM). Genes were divided according to pathways: a) reprogramming b) epithelial – mesenchymal transition c) apoptosis d) multidrug resistance, Hedgehog pathway and Notch pathway e) cell cycle. GAPDH, HPRT, beta ACTIN and beta 2 MICROGLOBULIN were used as housekeeping. \* $p < 0.05$ .

### Supplementary figure 3

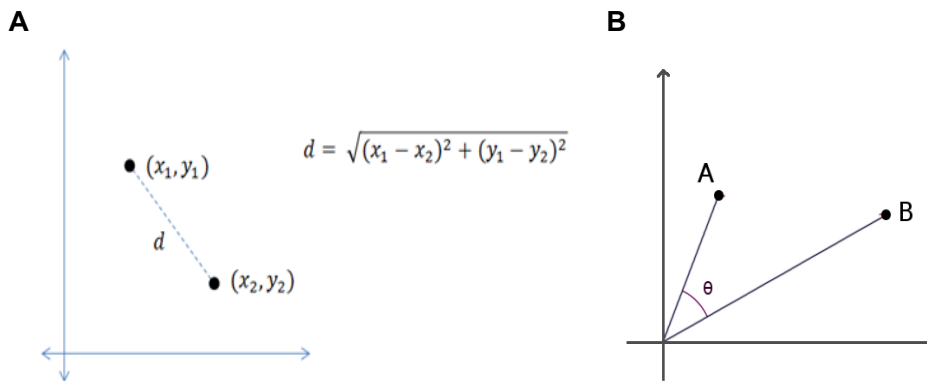

**Supplementary figure 3. Metric spaces.** We define as 'metric' a space where we can compute a distance between any two  $p$  and  $q$  vectors pertaining to that space. A distance function is defined by three basic properties:

1.  $d(p, q) \geq 0$  (non-negativity)
2.  $d(p, q) = 0$  if and only if  $p = q$  (identity of indiscernibles)
3.  $d(p, q) = d(q, p)$  (symmetry)
4.  $d(p, z) \leq d(p, q) + d(q, z)$  (subadditivity / triangle inequality).

In this paper, we deal with two different metrics: Euclidean and Angular (Correlation) metrics.

The following figure reports (dashed line) the Euclidean distance  $d$  between two  $p$  and  $q$  point vectors of coordinate  $(x_1, y_1)$  and  $(x_2, y_2)$ . The formula is an application of Pythagoras theorem, being  $d$  the hypotenuse of the triangle having cathets:  $(x_1 - x_2)$  and  $(y_1 - y_2)$  respectively.

The above formula extends to spaces having a number  $n$  of dimensions greater than two as (Fig. S1a):

$$d(p, q) = \sqrt{\sum_{i=1}^n (p_i - q_i)^2}$$

The above formula gives the Euclidean distances between two  $p$  and  $q$  gene expression profiles with a maximal  $n = 26$  components (different gene expression). In order to cope with missing values, we normalized the above distance formula by dividing it by  $n(e) =$  number of gene expressions values actually present in both profiles:

$$dnorm(p, q) = d(p, q)/n(e)$$

This normalization was necessary because any dimension (gene expression value) adds a positive contribution to distance, the distance computation over (slightly) varying dimensionality spaces does not alter the global metrics (17).

While both 'size' and 'shape' differences enter into Euclidean metrics, Correlation metrics takes into consideration only 'shape' differences between two vectors. In other words two  $p = (10,20,30)$  and  $q = (1,2,3)$  vectors have a null angular distance because the ratios among their components are conserved. In geometrical terms, that is to say we consider the distance between two vectors as the width of the angle between them (Fig. S1b). The cosine of the angles between two vectors correspond to their Pearson correlation coefficient according to:

$$\text{similarity}(p, q) = \cos(\theta) = \frac{P \cdot Q}{\|P\| \|Q\|} = \text{Pearson } r(p, q)$$

The maximal similarity being correspondent to a unit Pearson correlation between  $p$  and  $q$  and consequently to  $\theta = 0$ .

The angular distance is thus

$$\text{Angular Distance}(p, q) = \arccos(\text{similarity}(p, q)) = \arccos(r(p, q))$$

In order to go more in depth with these arguments we suggest to read Chapter 6 of:  
McCune, B., Grace, J. B., & Urban, D. L. (2002). Analysis of ecological communities.  
Glenneden Beach.

(<https://www.umass.edu/landeco/teaching/multivariate/readings/McCune.and.Grace.2002.chapter6.pdf>).

# Supplementary table 1

|                          | MYCC   | NOTCH1 | NOTCH2 | HES1   | GLI1   | MYCN   | TUBB3  | CENNA2 | CCND1  | CCNE2  | EFGR   | ERBB2  | IGFR1  |
|--------------------------|--------|--------|--------|--------|--------|--------|--------|--------|--------|--------|--------|--------|--------|
| OG 1h                    | 23.316 | 25.263 | 22.202 | 25.675 | 32.237 | 31.576 | 25.229 | 25.266 | 21.859 | 24.371 | 27.800 | 25.151 | 38.317 |
| OG 2h                    | 22.505 | 24.638 | 21.247 | 24.985 | 32.432 | 30.115 | 23.900 | 24.250 | 21.049 | 23.324 | 27.194 | 24.209 | 35.882 |
| OG 6h                    | 23.499 | 25.255 | 22.391 | 25.771 | 33.439 | 30.631 | 24.249 | 24.395 | 21.697 | 24.436 | 28.458 | 25.004 | 37.709 |
| OG 24h                   | 23.071 | 25.387 | 21.770 | 25.022 | 32.264 | 29.918 | 24.464 | 25.544 | 21.131 | 24.391 | 26.985 | 23.929 | 35.153 |
| RPMMAD 1h                | 21.679 | 24.721 | 24.232 | 24.232 | 31.605 | 28.637 | 24.093 | 24.307 | 21.194 | 23.576 | 27.673 | 24.670 | 36.598 |
| RPMMAD 2h                | 21.223 | 23.739 | 20.248 | 23.740 | 31.304 | 26.537 | 23.923 | 23.489 | 19.750 | 21.985 | 25.711 | 23.509 | 34.348 |
| RPMMAD 6h                | 23.673 | 25.722 | 22.708 | 25.183 | 34.378 | 31.649 | 24.459 | 24.945 | 22.192 | 24.585 | 27.990 | 25.388 | Under  |
| RPMMAD 24h               | 20.816 | 23.345 | 20.265 | 24.541 | 30.594 | 27.881 | 22.322 | 21.699 | 19.566 | 20.392 | 24.403 | 23.410 | 34.533 |
| RPWCLUM 1h               | 21.762 | 24.799 | 22.211 | 24.162 | 32.694 | 31.884 | 23.425 | 23.722 | 21.374 | 24.528 | 28.357 | 24.924 | 38.071 |
| RPWCLUM 2h               | 23.996 | 26.772 | 23.492 | 25.458 | 33.909 | 33.283 | 24.312 | 24.427 | 22.776 | 26.503 | 29.717 | 26.452 | Under  |
| RPWCLUM 6h               | 22.643 | 24.997 | 22.100 | 24.801 | 32.563 | 31.480 | 23.207 | 23.831 | 21.350 | 23.990 | 27.664 | 24.651 | 38.704 |
| RPWCLUM 24h              | 22.748 | 25.277 | 22.013 | 25.221 | 31.596 | 30.467 | 24.136 | 24.440 | 21.544 | 23.471 | 27.733 | 24.504 | 37.178 |
| RPMMAD 24h + OG 6h       | 20.605 | 24.631 | 21.934 | 25.888 | 33.003 | 29.705 | 25.016 | 23.764 | 21.155 | 23.566 | 27.725 | 24.368 | 20.208 |
| RPWCLUM 24h + OG 6h      | 23.305 | 26.560 | 23.932 | 27.773 | 38.108 | Under  | 35.203 | 34.543 | 31.596 | 35.410 | Under  | 34.962 | 30.123 |
| RPWCLUM 24h + RPMMAD 6h  | 21.816 | 26.046 | 23.930 | 26.899 | 33.924 | 30.535 | 25.797 | 24.584 | 22.350 | 24.698 | 28.816 | 25.614 | 21.424 |
| RPWCLUM 24h + RPMMAD 6h  | 22.031 | Under  | 36.667 | Under  | 36.385 | Under  | Under  | Under  | 37.887 | Under  | 38.026 | Under  | 35.611 |
| RPMMAD 24h + RPWCLUM 6h  | 21.816 | 27.488 | 24.939 | 27.379 | 36.427 | 32.156 | 26.714 | 25.189 | 23.692 | 27.107 | 31.118 | 27.365 | 22.835 |
| RPWCLUM 24h + RPWCLUM 6h | 22.836 | 34.592 | 32.853 | 32.307 | 35.974 | Under  | 34.986 | 33.507 | 31.267 | 35.974 | 37.126 | 34.695 | 30.537 |

  

|                          | GAPDH  | HPRT   | BACTIN | B2 MICRO | SOX2   | NANOG  | OCT4   | ZEB1   | VEGFA2 | CASP7  | CASP8  | BAX    | BCL2   |
|--------------------------|--------|--------|--------|----------|--------|--------|--------|--------|--------|--------|--------|--------|--------|
| OG 1h                    | 19.728 | 27.481 | 21.978 | 22.607   | 23.146 | 27.992 | 28.081 | 32.629 | 25.245 | 25.352 | 25.562 | 23.241 | 28.311 |
| OG 2h                    | 18.559 | 26.650 | 21.134 | 21.658   | 21.933 | 27.346 | 27.489 | 31.445 | 23.962 | 24.364 | 24.385 | 22.368 | 27.275 |
| OG 6h                    | 19.430 | 27.416 | 21.626 | 22.230   | 22.946 | 28.604 | 28.381 | 32.345 | 24.836 | 25.518 | 24.979 | 22.872 | 29.280 |
| OG 24h                   | 19.105 | 27.733 | 22.271 | 22.176   | 22.342 | 27.510 | 27.854 | 31.587 | 25.138 | 25.910 | 24.128 | 22.823 | 27.362 |
| RPMMAD 1h                | 18.605 | 26.667 | 21.205 | 22.211   | 22.709 | 27.527 | 28.010 | 31.897 | 24.367 | 25.304 | 24.738 | 22.487 | 27.974 |
| RPMMAD 2h                | 16.955 | 25.217 | 20.368 | 20.645   | 21.175 | 26.213 | 26.713 | 31.587 | 22.611 | 24.082 | 22.822 | 21.822 | 26.629 |
| RPMMAD 6h                | 19.939 | 27.400 | 21.625 | 22.713   | 23.332 | 28.794 | 28.930 | 32.365 | 24.962 | 25.790 | 25.232 | 23.500 | 29.134 |
| RPMMAD 24h               | 15.730 | 24.481 | 20.727 | 20.602   | 19.537 | 24.761 | 26.116 | 28.336 | 21.716 | 24.402 | 21.545 | 21.403 | 24.628 |
| RPWCLUM 1h               | 19.211 | 27.058 | 21.279 | 22.533   | 23.398 | 28.005 | 28.482 | 32.401 | 24.694 | 27.231 | 25.085 | 22.465 | 28.242 |
| RPWCLUM 2h               | 20.879 | 28.821 | 22.467 | 24.120   | 24.540 | 29.811 | 30.272 | 34.188 | 26.209 | 27.231 | 26.773 | 23.850 | 29.356 |
| RPWCLUM 6h               | 18.511 | 26.685 | 20.728 | 21.733   | 22.323 | 28.669 | 28.291 | 31.592 | 24.418 | 24.334 | 24.250 | 22.821 | 28.732 |
| RPWCLUM 24h              | 18.626 | 26.631 | 21.254 | 21.873   | 22.185 | 27.846 | 28.319 | 31.516 | 24.294 | 24.701 | 24.210 | 22.518 | 27.912 |
| RPMMAD 24h + OG 6h       | 18.938 | 22.654 | 17.146 | 21.926   | 22.887 | 27.432 | 27.889 | 32.587 | 25.694 | 24.645 | 24.322 | 22.512 | 28.568 |
| RPWCLUM 24h + OG 6h      | 32.648 | 34.007 | 29.612 | 33.595   | 34.469 | 36.944 | 39.050 | 32.587 | 35.154 | 34.496 | 35.214 | 33.192 | Under  |
| RPMMAD 24h + RPMMAD 6h   | 20.234 | 23.703 | 18.631 | 23.075   | 24.155 | 29.193 | 31.261 | 28.766 | 27.101 | 25.632 | 25.401 | 23.402 | 29.372 |
| RPWCLUM 24h + RPMMAD 6h  | 38.501 | Under  | 36.187 | 38.689   | Under  | 36.980 | Under  | 32.348 | 38.202 | Under  | Under  | Under  | 38.229 |
| RPWCLUM 24h + RPWCLUM 6h | 21.993 | 25.209 | 19.982 | 24.820   | 26.088 | 31.089 | 31.877 | 32.976 | 27.532 | 27.076 | 26.720 | 24.351 | 30.339 |
| RPWCLUM 24h + RPWCLUM 6h | 31.294 | 33.143 | 29.381 | 32.987   | 33.967 | 35.912 | 39.443 | 33.984 | 32.693 | 34.923 | 36.689 | 31.189 | Under  |

**Supplementary table 1.** Raw data for gene expression of MCF7 cells exposed to microgravity. Values represent the average of the triplicate as described in material and methods.



**Supplementary Table 2**

| <b>GENE NAME</b>                                          | <b>ID ASSAY</b> |
|-----------------------------------------------------------|-----------------|
| glyceraldehyde-3-phosphate dehydrogenase<br>(GAPDH)       | Hs02786624_g1   |
| hypoxanthine guanine phosphoribosyl transferase<br>(HPRT) | Hs02800695_m1   |
| $\beta$ -Actin (BACTIN)                                   | Hs01060665_g1   |
| $\beta$ -2-microglobulin (B2MICRO)                        | Hs00187842_m1   |
| NOTCH1                                                    | Hs01062014_m1   |
| NOTCH2                                                    | Hs01050702_m1   |
| GLI1                                                      | Hs00171790_m1   |
| B-cell lymphoma 2 (BCL2)                                  | Hs00699441_m1   |
| BAX                                                       | Hs00180269_m1   |
| Vascular endothelial growth factor A (VEGFA2)             | Hs00900055_m1   |
| Cyclin A2 (CCNA2)                                         | Hs00996788_m1   |
| Cyclin D1 (CCND1)                                         | Hs01050839_m1   |
| Cyclin E2 (CCNE2)                                         | Hs00180319_m1   |
| MYC proto-oncogene                                        | Hs00153408_m1   |
| MYCN proto-oncogene                                       | Hs00232074_m1   |
| Caspase7 (CASP7)                                          | Hs00169152_m1   |
| Caspase8 (CASP8)                                          | Hs06630780_s1   |
| epidermal growth factor receptor (EGFR)                   | Hs01076090_m1   |
| erb-b2 receptor tyrosine kinase 2 (ERBB2)                 | Hs01001580_m1   |
| insulin like growth factor 1 receptor (IGF1R)             | Hs00609566_m1   |
| HES1                                                      | Hs00172878_m1   |
| POU Class 5 Homeobox 1 (OCT4)                             | Hs04260367_gH   |

|                                             |               |
|---------------------------------------------|---------------|
| SRY-box 2 (SOX2)                            | Hs01053049_s1 |
| Nanog homeobox (NANOG)                      | Hs02387400_g1 |
| zinc finger E-box binding homeobox 1 (ZEB1) | Hs01566408_m1 |
| $\beta$ -3-tubulin (TUBB3)                  | Hs00801390_s1 |

**Supplementary Table 2.** List of Taqman assay IDs for gene expression analyses

### Supplementary References

1. Giuliani A, Tsuchiya M, Yoshikawa K. Self-organization of genome expression from embryo to terminal cell fate: single-cell statistical mechanics of biological regulation. *Entropy*. 2017;20(1):13.
2. Bak P. *How nature works: the science of self-organized criticality*: Springer Science & Business Media; 2013.
3. Tsuchiya M, Giuliani A, Hashimoto M, Erenpreisa J, Yoshikawa K. Self-organizing global gene expression regulated through criticality: mechanism of the cell-fate change. *PloS one*. 2016;11(12):e0167912.
4. Ye Z, Sarkar CA. Towards a quantitative understanding of cell identity. *Trends in cell biology*. 2018.
5. Mojtahedi M, Skupin A, Zhou J, Castano IG, Leong-Quong RY, Chang H, et al. Cell fate decision as high-dimensional critical state transition. *PLoS biology*. 2016;14(12):e2000640.
6. Zhou JX, Isik Z, Xiao C, Rubin I, Kauffman SA, Schroeder M, et al. Systematic drug perturbations on cancer cells reveal diverse exit paths from proliferative state. *Oncotarget*. 2016;7(7):7415.
7. Frauenfelder H, Sligar SG, Wolynes PG. The energy landscapes and motions of proteins. *Science*. 1991;254(5038):1598-603.
8. Giuliani A. Statistical mechanics of gene expression networks: Increasing connectivity as a response to stressful condition. *Adv Syst Bio*. 2014;3:3-6.
9. Huang S. Cell lineage determination in state space: a systems view brings flexibility to dogmatic canonical rules. *PLoS biology*. 2010;8(5):e1000380.

10. Censi F, Giuliani A, Bartolini P, Calcagnini G. A multiscale graph theoretical approach to gene regulation networks: a case study in atrial fibrillation. *IEEE Transactions on Biomedical Engineering*. 2011;58(10):2943-6.
11. Tsuchiya M, Selvarajoo K, Piras V, Tomita M, Giuliani A. Local and global responses in complex gene regulation networks. *Physica A: Statistical Mechanics and its Applications*. 2009;388(8):1738-46.
12. Harfe BD, Scherz PJ, Nissim S, Tian H, McMahon AP, Tabin CJ. Evidence for an expansion-based temporal Shh gradient in specifying vertebrate digit identities. *Cell*. 2004;118(4):517-28.
13. Scheffer M, Carpenter SR. Catastrophic regime shifts in ecosystems: linking theory to observation. *Trends in ecology & evolution*. 2003;18(12):648-56.
14. La Manno G, Soldatov R, Zeisel A, Braun E, Hochgerner H, Petukhov V, et al. RNA velocity of single cells. *Nature*. 2018;560(7719):494.
15. Johnson RA, Wichern DW. Multivariate analysis. *Encyclopedia of Statistics in Quality and Reliability*. 2008;3.
16. Reinberg A, Smolensky MH. Investigative methodology for chronobiology. *Biological Rhythms and Medicine*: Springer; 1983. p. 23-46.
17. Sneath P. Distortions of taxonomic structure from incomplete data on a restricted set of reference strains. *Microbiology*. 1983;129(4):1045-73.
